# Supplementary material for: Composites of CoFe2O4/Graphene oxide/Kaolinite for adsorption of lead ion from aqueous solution
Source: Frontiers journal article supplement (doi:10.3389/fmats.2023.1277467), 2023-11-10
Supplement: Data_Sheet_6.PDF [file Data_Sheet_6.PDF]

Quantachrome NovaWin - Data Acquisition and Reduction  
for NOVA instruments  
©1994-2010, Quantachrome Instruments  
version 11.0

|                                                                                                             |                                      |                                 |  |
|-------------------------------------------------------------------------------------------------------------|--------------------------------------|---------------------------------|--|
| Analysis                                                                                                    |                                      | Report                          |  |
| Operator:alex                                                                                               | Date:2022/05/12                      | Operator:alex                   |  |
| Date:5/12/2022                                                                                              |                                      |                                 |  |
| Sample ID: K GCF 2                                                                                          | Filename:                            | C:\QCdata\Physisorb\K GCF 1.qps |  |
| Sample Desc:                                                                                                | Comment:                             |                                 |  |
| Sample weight: 0.05 g                                                                                       | Sample Volume: 0.012821 cc           | Sample                          |  |
| Density:3.9 g/cc                                                                                            |                                      |                                 |  |
| Outgas Time: 8.0 hrs                                                                                        | OutgasTemp: 300.0 C                  |                                 |  |
| Analysis gas: Nitrogen                                                                                      | Bath Temp: 77.3 K                    |                                 |  |
| Press. Tolerance:0.100/0.100 (ads/des) Equil time: 60/60 sec (ads/des) Equil timeout: 240/240 sec (ads/des) |                                      |                                 |  |
| Analysis Time: 77.6 min                                                                                     | End of run: 2022/05/12 12:56:14      | Instrument:                     |  |
| Nova Station B                                                                                              |                                      |                                 |  |
| Cell ID: 2                                                                                                  |                                      | F/W version:                    |  |
| 0.00                                                                                                        |                                      |                                 |  |
| Adsorbate Nitrogen                                                                                          | Temperature 77.350K                  |                                 |  |
| Molec. Wt.: 28.013 g                                                                                        | Cross Section: 16.200 Å <sup>2</sup> | Liquid                          |  |
| Density: 0.808 g/cc                                                                                         |                                      |                                 |  |

| - 1) ]     | Relative<br>Pressure<br>P/Po | Volume @ STP<br>cc/g | 1 / [ W((Po/P) |
|------------|------------------------------|----------------------|----------------|
|            | 5.08200e-02                  | 43.6089              |                |
| 9.8234e-01 | 1.07783e-01                  | 67.8733              |                |
| 1.4241e+00 | 1.80328e-01                  | 97.7470              |                |
| 1.8008e+00 | 2.33193e-01                  | 119.6623             |                |
| 2.0334e+00 | 3.06948e-01                  | 150.7172             |                |
| 2.3512e+00 |                              |                      |                |

BET summary

|                              |                           |
|------------------------------|---------------------------|
| Slope =                      | 5.237                     |
| Intercept =                  | 7.977e-01                 |
| Correlation coefficient, r = | 0.992459                  |
| C constant=                  | 7.565                     |
| Surface Area =               | 577.110 m <sup>2</sup> /g |

Quantachrome NovaWin - Data Acquisition and Reduction  
for NOVA instruments  
©1994-2010, Quantachrome Instruments  
version 11.0

|                                                                                                             |                                      |                                 |
|-------------------------------------------------------------------------------------------------------------|--------------------------------------|---------------------------------|
| Analysis                                                                                                    |                                      | Report                          |
| Operator:alex                                                                                               | Date:2022/05/12                      | Operator:alex                   |
| Date:5/12/2022                                                                                              |                                      |                                 |
| Sample ID: K GCF 2                                                                                          | Filename:                            | C:\QCdata\Physisorb\K GCF 1.qps |
| Sample Desc:                                                                                                | Comment:                             |                                 |
| Sample weight: 0.05 g                                                                                       | Sample Volume: 0.012821 cc           | Sample                          |
| Density:3.9 g/cc                                                                                            |                                      |                                 |
| Outgas Time: 8.0 hrs                                                                                        | OutgasTemp: 300.0 C                  |                                 |
| Analysis gas: Nitrogen                                                                                      | Bath Temp: 77.3 K                    |                                 |
| Press. Tolerance:0.100/0.100 (ads/des) Equil time: 60/60 sec (ads/des) Equil timeout: 240/240 sec (ads/des) |                                      |                                 |
| Analysis Time: 77.6 min                                                                                     | End of run: 2022/05/12 12:56:14      | Instrument:                     |
| Nova Station B                                                                                              |                                      |                                 |
| Cell ID: 2                                                                                                  |                                      | F/W version:                    |
| 0.00                                                                                                        |                                      |                                 |
| Adsorbate Nitrogen                                                                                          | Temperature 77.350K                  |                                 |
| Molec. Wt.: 28.013 g                                                                                        | Cross Section: 16.200 Å <sup>2</sup> | Liquid                          |
| Density: 0.808 g/cc                                                                                         |                                      |                                 |

Surface Area Data

|                               |           |
|-------------------------------|-----------|
| MultiPoint BET                | 5.771e+02 |
| m <sup>2</sup> /g             |           |
| NLDFT cumulative surface area | 1.910e+02 |
| m <sup>2</sup> /g             |           |

Pore Volume Data

|                                     |           |
|-------------------------------------|-----------|
| HK method cumulative pore volume    | 1.334e-01 |
| cc/g                                |           |
| SF method cumulative pore volume    | 1.428e-01 |
| cc/g                                |           |
| NLDFT method cumulative pore volume | 2.135e-01 |
| cc/g                                |           |

Pore Size Data

|                              |           |
|------------------------------|-----------|
| HK method pore Radius (Mode) | 1.838e+00 |
| Å                            |           |
| SF method pore Radius (Mode) | 2.261e+00 |
| Å                            |           |
| NLDFT pore Radius (Mode)     | 1.324e+01 |
| Å                            |           |



Quantachrome NovaWin - Data Acquisition and Reduction  
for NOVA instruments  
©1994-2010, Quantachrome Instruments  
version 11.0

|                                                                                                             |                                      |                                  |
|-------------------------------------------------------------------------------------------------------------|--------------------------------------|----------------------------------|
| Analysis                                                                                                    |                                      | Report                           |
| Operator:alex                                                                                               | Date:2022/05/11                      | Operator:alex                    |
| Date:5/11/2022                                                                                              |                                      |                                  |
| Sample ID: clay a 2                                                                                         | Filename:                            | C:\QCdata\Physisorb\clay a 1.qps |
| Sample Desc:                                                                                                | Comment:                             |                                  |
| Sample weight: 0.05 g                                                                                       | Sample Volume: 0.012821 cc           | Sample                           |
| Density:3.9 g/cc                                                                                            |                                      |                                  |
| Outgas Time: 8.0 hrs                                                                                        | OutgasTemp: 300.0 C                  |                                  |
| Analysis gas: Nitrogen                                                                                      | Bath Temp: 77.3 K                    |                                  |
| Press. Tolerance:0.100/0.100 (ads/des) Equil time: 60/60 sec (ads/des) Equil timeout: 240/240 sec (ads/des) |                                      |                                  |
| Analysis Time: 73.1 min                                                                                     | End of run: 2022/05/11 15:12:06      | Instrument:                      |
| Nova Station B                                                                                              |                                      |                                  |
| Cell ID: 2                                                                                                  |                                      | F/W version:                     |
| 0.00                                                                                                        |                                      |                                  |
| Adsorbate Nitrogen                                                                                          | Temperature 77.350K                  |                                  |
| Molec. Wt.: 28.013 g                                                                                        | Cross Section: 16.200 Å <sup>2</sup> | Liquid                           |
| Density: 0.808 g/cc                                                                                         |                                      |                                  |

| - 1) ]     | Relative<br>Pressure<br>P/Po | Volume @ STP<br>cc/g | 1 / [ W((Po/P) |
|------------|------------------------------|----------------------|----------------|
|            | 4.82940e-02                  | 22.7100              |                |
| 1.7878e+00 | 1.10016e-01                  | 44.8377              |                |
| 2.2059e+00 | 1.71241e-01                  | 66.3619              |                |
| 2.4912e+00 | 2.33496e-01                  | 87.7911              |                |
| 2.7763e+00 | 2.95533e-01                  | 108.8948             |                |
| 3.0824e+00 |                              |                      |                |

BET summary

|                              |                           |
|------------------------------|---------------------------|
| Slope =                      | 5.112                     |
| Intercept =                  | 1.591e+00                 |
| Correlation coefficient, r = | 0.996849                  |
| C constant=                  | 4.214                     |
| Surface Area =               | 519.528 m <sup>2</sup> /g |

Quantachrome NovaWin - Data Acquisition and Reduction  
for NOVA instruments  
©1994-2010, Quantachrome Instruments  
version 11.0

|                                        |                                      |                                  |
|----------------------------------------|--------------------------------------|----------------------------------|
| Analysis                               |                                      | Report                           |
| Operator:alex                          | Date:2022/05/11                      | Operator:alex                    |
| Date:5/11/2022                         |                                      |                                  |
| Sample ID: clay a 2                    | Filename:                            | C:\QCdata\Physisorb\clay a 1.qps |
| Sample Desc:                           | Comment:                             |                                  |
| Sample weight: 0.05 g                  | Sample Volume: 0.012821 cc           | Sample                           |
| Density:3.9 g/cc                       |                                      |                                  |
| Outgas Time: 8.0 hrs                   | OutgasTemp: 300.0 C                  |                                  |
| Analysis gas: Nitrogen                 | Bath Temp: 77.3 K                    |                                  |
| Press. Tolerance:0.100/0.100 (ads/des) | Equil time: 60/60 sec (ads/des)      | Equil timeout:                   |
| 240/240 sec (ads/des)                  |                                      |                                  |
| Analysis Time: 73.1 min                | End of run: 2022/05/11 15:12:06      | Instrument:                      |
| Nova Station B                         |                                      |                                  |
| Cell ID: 2                             |                                      | F/W version:                     |
| 0.00                                   |                                      |                                  |
| Adsorbate Nitrogen                     | Temperature 77.350K                  |                                  |
| Molec. Wt.: 28.013 g                   | Cross Section: 16.200 Å <sup>2</sup> | Liquid                           |
| Density: 0.808 g/cc                    |                                      |                                  |

Surface Area Data

|                               |           |
|-------------------------------|-----------|
| MultiPoint BET                | 5.195e+02 |
| m <sup>2</sup> /g             |           |
| NLDFT cumulative surface area | 1.294e+02 |
| m <sup>2</sup> /g             |           |

Pore Volume Data

|                                     |           |
|-------------------------------------|-----------|
| HK method cumulative pore volume    | 9.240e-02 |
| cc/g                                |           |
| SF method cumulative pore volume    | 1.004e-01 |
| cc/g                                |           |
| NLDFT method cumulative pore volume | 1.495e-01 |
| cc/g                                |           |

Pore Size Data

|                              |           |
|------------------------------|-----------|
| HK method pore Radius (Mode) | 9.237e+00 |
| Å                            |           |
| SF method pore Radius (Mode) | 1.661e+01 |
| Å                            |           |
| NLDFT pore Radius (Mode)     | 1.324e+01 |
| Å                            |           |



Quantachrome NovaWin - Data Acquisition and Reduction  
for NOVA instruments  
©1994-2010, Quantachrome Instruments  
version 11.0

|                                                                                                              |                                      |                                  |  |
|--------------------------------------------------------------------------------------------------------------|--------------------------------------|----------------------------------|--|
| Analysis                                                                                                     |                                      | Report                           |  |
| Operator: alex                                                                                               | Date: 2022/05/11                     | Operator: alex                   |  |
| Date: 5/11/2022                                                                                              |                                      |                                  |  |
| Sample ID: 45%GCF B                                                                                          | Filename:                            | C:\QCdata\Physisorb\45%GCF A.qps |  |
| Sample Desc:                                                                                                 | Comment:                             |                                  |  |
| Sample weight: 0.1 g                                                                                         | Sample Volume: 0.025641 cc           | Sample                           |  |
| Density: 3.9 g/cc                                                                                            |                                      |                                  |  |
| Outgas Time: 0.0 hrs                                                                                         | OutgasTemp: 0.0 C                    |                                  |  |
| Analysis gas: Nitrogen                                                                                       | Bath Temp: 77.3 K                    |                                  |  |
| Press. Tolerance: 0.100/0.100 (ads/des) Equil time: 60/60 sec (ads/des) Equil timeout: 240/240 sec (ads/des) |                                      |                                  |  |
| Analysis Time: 87.2 min                                                                                      | End of run:                          | 2022/05/11 18:06:47 Instrument:  |  |
| Nova Station C                                                                                               |                                      |                                  |  |
| Cell ID: 2                                                                                                   |                                      | F/W version:                     |  |
| 0.00                                                                                                         |                                      |                                  |  |
| Adsorbate Nitrogen                                                                                           | Temperature 77.350K                  |                                  |  |
| Molec. Wt.: 28.013 g                                                                                         | Cross Section: 16.200 Å <sup>2</sup> | Liquid                           |  |
| Density: 0.808 g/cc                                                                                          |                                      |                                  |  |

| - 1) ]     | Relative<br>Pressure<br>P/Po | Volume @ STP<br>cc/g | 1 / [ W((Po/P) |
|------------|------------------------------|----------------------|----------------|
|            | 4.53260e-02                  | 13.1670              |                |
| 2.8851e+00 | 1.08611e-01                  | 25.1785              |                |
| 3.8719e+00 | 1.83944e-01                  | 39.1583              |                |
| 4.6057e+00 | 2.35364e-01                  | 48.7720              |                |
| 5.0497e+00 | 3.10540e-01                  | 62.6962              |                |
| 5.7480e+00 |                              |                      |                |

BET summary

|                              |                           |
|------------------------------|---------------------------|
| Slope =                      | 10.507                    |
| Intercept =                  | 2.575e+00                 |
| Correlation coefficient, r = | 0.992805                  |
| C constant =                 | 5.081                     |
| Surface Area =               | 266.203 m <sup>2</sup> /g |

Quantachrome NovaWin - Data Acquisition and Reduction  
for NOVA instruments  
©1994-2010, Quantachrome Instruments  
version 11.0

|                                                                                                             |                                      |                                  |
|-------------------------------------------------------------------------------------------------------------|--------------------------------------|----------------------------------|
| Analysis                                                                                                    |                                      | Report                           |
| Operator:alex                                                                                               | Date:2022/05/11                      | Operator:alex                    |
| Date:5/11/2022                                                                                              |                                      |                                  |
| Sample ID: 45%GCF B                                                                                         | Filename:                            | C:\QCdata\Physisorb\45%GCF A.qps |
| Sample Desc:                                                                                                | Comment:                             |                                  |
| Sample weight: 0.1 g                                                                                        | Sample Volume: 0.025641 cc           | Sample                           |
| Density:3.9 g/cc                                                                                            |                                      |                                  |
| Outgas Time: 0.0 hrs                                                                                        | OutgasTemp: 0.0 C                    |                                  |
| Analysis gas: Nitrogen                                                                                      | Bath Temp: 77.3 K                    |                                  |
| Press. Tolerance:0.100/0.100 (ads/des) Equil time: 60/60 sec (ads/des) Equil timeout: 240/240 sec (ads/des) |                                      |                                  |
| Analysis Time: 87.2 min                                                                                     | End of run: 2022/05/11 18:06:47      | Instrument:                      |
| Nova Station C                                                                                              |                                      |                                  |
| Cell ID: 2                                                                                                  |                                      | F/W version:                     |
| 0.00                                                                                                        |                                      |                                  |
| Adsorbate Nitrogen                                                                                          | Temperature 77.350K                  |                                  |
| Molec. Wt.: 28.013 g                                                                                        | Cross Section: 16.200 Å <sup>2</sup> | Liquid                           |
| Density: 0.808 g/cc                                                                                         |                                      |                                  |

Surface Area Data

|                               |           |
|-------------------------------|-----------|
| MultiPoint BET                | 2.662e+02 |
| m <sup>2</sup> /g             |           |
| NLDFT cumulative surface area | 7.503e+01 |
| m <sup>2</sup> /g             |           |

Pore Volume Data

|                                     |           |
|-------------------------------------|-----------|
| HK method cumulative pore volume    | 5.151e-02 |
| cc/g                                |           |
| SF method cumulative pore volume    | 5.574e-02 |
| cc/g                                |           |
| NLDFT method cumulative pore volume | 8.903e-02 |
| cc/g                                |           |

Pore Size Data

|                              |           |
|------------------------------|-----------|
| HK method pore Radius (Mode) | 1.838e+00 |
| Å                            |           |
| SF method pore Radius (Mode) | 2.261e+00 |
| Å                            |           |
| NLDFT pore Radius (Mode)     | 1.324e+01 |
| Å                            |           |
